# Supplementary material for: Cilia-related gene signature in the nasal mucosa correlates with disease severity and outcomes in critical respiratory syncytial virus bronchiolitis
Source: PubMed Central journal article supplement (PMC9540395; doi:10.3389/fimmu.2022.924792), 2022-09-23
Supplement: Table_1.pdf [file Table_1.pdf]

**Supplemental Table 1.** Comparison of participants by respiratory support

|                                               | <b>NIS<br/>≤ 3 Days</b> | <b>NIS<br/>&gt; 3 Days</b> | <b>IMV</b>      | <b>P-Adj</b> |
|-----------------------------------------------|-------------------------|----------------------------|-----------------|--------------|
| <b>n</b>                                      | 12                      | 8                          | 8               |              |
| <b>Median Age (mon) [IQR]</b>                 | 1.9 [1.4-2.3]           | 4.0 [2.0-6.0]              | 3.0 [1.8-5.0]   | 0.29         |
| <b>Gest Age &lt;35 wks at Birth (%)</b>       | 0 (0.0)                 | 0 (0.0)                    | 1 (12.5)        | 0.63         |
| <b>Sex</b>                                    |                         |                            |                 |              |
| Male (%)                                      | 8 (66.7)                | 5 (62.5)                   | 1 (12.5)        | 0.18         |
| Female (%)                                    | 4 (33.3)                | 3 (37.5)                   | 7 (87.5)        |              |
| <b>Race</b>                                   |                         |                            |                 |              |
| White (%)                                     | 5 (41.7)                | 6 (75.0)                   | 4 (50.0)        | 0.62         |
| African American (%)                          | 3 (25.0)                | 0 (0.0)                    | 1 (12.5)        |              |
| Asian (%)                                     | 0 (0.0)                 | 1 (12.5)                   | 1 (12.5)        |              |
| Other (%)                                     | 4 (33.3)                | 1 (12.5)                   | 2 (25.0)        |              |
| <b>Ethnicity</b>                              |                         |                            |                 |              |
| Non-Hispanic (%)                              | 8 (66.7)                | 8 (66.7)                   | 6 (75.0)        | 0.85         |
| Hispanic (%)                                  | 4 (33.3)                | 4 (33.3)                   | 2 (25.0)        |              |
| <b>Sample Collection</b>                      |                         |                            |                 |              |
| Day of Illness (d) [IQR]                      | 4.5 [3.0-6.0]           | 4.0 [3.0-4.0]              | 5.0 [3.8-5.3]   | 0.29         |
| <b>Respiratory Support</b>                    |                         |                            |                 |              |
| Flow Rate (L/min/kg) [IQR]                    | 1.6 [1.4-1.9]           | 2.1 [1.9-2.1]              | -               | 0.29         |
| FiO <sub>2</sub> (%) [IQR]                    | 27.5 [24.0-31.3]        | 30.0 [28.8-36.3]           | -               | 0.35         |
| <b>Outcomes</b>                               |                         |                            |                 |              |
| Median ICU LOS (d) [IQR]                      | 3.0 [2.7-3.5]           | 5.2 [4.6-5.9]              | 9.8 [7.8-12.0]  | 0.0002       |
| Median Hospital LOS (d) [IQR]                 | 3.8 [3.6-4.5]           | 6.0 [5.3-6.9]              | 13.2 [9.5-15.9] | 0.0003       |
| Median Respiratory Support Duration (d) [IQR] | 2.67 [1.9-3.0]          | 4.5 [4.0-5.3]              | 8.5 [7.3-11.4]  | 0.0001       |

*Definition of abbreviations:* NIS = non-invasive support, IMV =invasive mechanical ventilation, Gest = gestational, wks = weeks, d = days, mon = months, IQR = interquartile range, L = liters, min = minute, kg = kilogram, FiO<sub>2</sub> = fraction of inspired oxygen ICU = intensive care unit, LOS = length of stay
